# Supplementary material for: Phytochemical-assisted synthesis, optimization, and characterization of silver nanoparticles for antimicrobial activity
Source: Royal Society of Chemistry journal article supplement (doi:10.1039/d4ra08900f), 2025-01-01
Supplement: d4ra08900f1.pdf [file d4ra08900f1.pdf]

## Bacteria preparation method

A frozen vial of bacteria stock was taken from a liquid nitrogen dewar and allowed to thaw in ice. 10 mL of LB broth (35g/L) was prepared in a sterile tube. The Sterile inoculating loop was then dipped into the thawed bacteria stock, and gently swirled in the LB broth. The tube was loosely capped to allow gas exchange, and placed in a shaker incubator set to 37°C. The culture was incubated overnight with continuous shaking. The culture turned turbid, indicating bacterial growth.

| A<br>of | summary of the effect of reaction parameters on optical properties AgNPs. |           |               |
|---------|---------------------------------------------------------------------------|-----------|---------------|
|         | Parameter                                                                 | Variation | SPR Peak (nm) |
|         | Temperature (°C)                                                          | 75        | 426           |
|         |                                                                           | 50        | 429           |
|         |                                                                           | 25        | 431           |
|         | Time (min)                                                                | 60        | 440           |
|         |                                                                           | 30        | 438           |
|         |                                                                           | 15        | 437           |
|         | Precursor conc (mM)                                                       | 6         | 434           |
|         |                                                                           | 3         | 426           |
|         |                                                                           | 1         | 415           |
|         | PE: Ag <sup>+</sup> ratio (mL)                                            | 20:80     | 434           |
|         |                                                                           | 10:90     | 433           |
|         |                                                                           | 5:95      | 430           |

\*PE: Ag<sup>+</sup> indicates the volume of plant extract to silver ion solution
